# Supplementary material for: Estimating the expected value of partial perfect information in health economic evaluations using integrated nested Laplace approximation
Source: PubMed Central journal article supplement (PMC5031203; doi:10.1002/sim.6983), 2016-05-18
Supplement: SIM-35-4264-s001.pdf [file SIM-35-4264-s001.pdf]

## 612 A. The Integrated Nested Laplace Approximation

613 The Integrated Nested Laplace Approximation (INLA) is a fast approximate Bayesian inference method for a wide class  
614 of models known as Latent Gaussian Models (LGMs) [53]. This class of models is broad as many standard modelling  
615 scenarios can be reformulated as LGMs, including regression models, dynamic models and spatio-temporal models [53].

616 A LGM is characterised by the fact that the data,  $y_i$  can be defined by a parametric family with a parameter  $\mu_i$   
617 linked to a structured linear predictor  $\eta_i$ , based on a set of covariates  $\gamma_i = (\gamma_{i1}, \dots, \gamma_{iJ}, \dots, \gamma_{i(J+K)})$ , through some  
618 link function  $h(\cdot)$ :

$$h(\mu_i) = \eta_i = \alpha + \sum_{j=1}^J f_j(\gamma_{ij}) + \sum_{k=1}^K \beta_k \gamma_{ik} + \epsilon_i, \quad (10)$$

619 where  $f_j(\cdot)$  are unknown functions of the covariates  $\gamma_i$ ,  $\beta = (\beta_1, \dots, \beta_K)$  are fixed regression coefficients,  $\epsilon_i$  is some error  
620 term, and  $J$  and  $K$  are the number of functions of covariates and regressed covariates in the model [75]. The functions  $f_j$   
621 can be of any form and typically can represent autoregressive models, spatial effects or seasonal effects. In these settings  
622 the covariates  $\gamma_i$  give sequential or spatial information about the data  $y_i$ . A standard generalised linear model also fits this  
623 framework where all the functions  $f_j(\cdot)$  are equal to 0.

624 To complete the LGM formulation, a Gaussian prior is assigned to the set of parameters defining the linear predictor  
625  $\theta = (\alpha, \beta, f_j(\cdot), \epsilon_i)$ , depending on some hyperparameters  $\lambda$  (typically, these determine the precision matrix of  $\theta$ ). Clearly,  
626 the number of elements in  $\theta$  is likely to be large and therefore, to allow for fast computation, INLA is restricted to the  
627 case where the Gaussian prior used has a “sparse” precision matrix. This Gaussian prior with a sparse precision matrix is  
628 also known as a Gaussian Markov Random Field (GMRF) [76]. Fast computation using INLA is ensured if  $\lambda$  contains a  
629 relatively small number of elements, typically no greater than 6.

630 At first glance, enforcing sparsity in the prior for  $\theta$  may seem restrictive as sparsity in the covariance matrix implies  
631 *marginal* independence. However, sparsity in a precision matrix only enforces *conditional* independence, a much looser  
632 restriction. A 0 entry in the precision matrix implies that the two elements are independent conditionally on all other  
633 elements. The *Markov* property encoded in this sparse matrix implies that the field is memoryless: values only depend  
634 directly on a few neighbours. In the SPDE-INLA setting these neighbours are those  $\omega$  values which share a triangle.

635 Operationally, INLA explores the approximate joint posterior of the hyperparameters  $\lambda$  by determining the density of  
636 the Laplace approximation at a grid of points in the support of  $\lambda$ . This grid is found by “stepping” along each axis of the  
637 hyperparameter space until the density falls below a specified threshold. The density of the Laplace approximation is then  
638 evaluated at each combination of these axis points; if the density at these points is above the threshold then the point is  
639 included in the grid. Interpolation is then used to approximate the posterior at all points in  $\lambda$ . The posterior marginals for  
640  $\lambda$  can then be found by using these lattice points for numerical integration.

641 The marginals for the parameters  $\theta$  are then approximated by another (simplified) Laplace approximation. This Laplace  
642 approximation is evaluated at each of hyperparameter values on the lattice and the approximate marginals for  $\theta$  are given  
643 as a weighted sum of the Laplace approximation for each configuration of the hyperparameter set (weighted by the density  
644 at that point). In this sense, the approximate marginals for  $\theta$  are *nested* within the Laplace approximation for posterior  
645 distribution of the hyperparameters.

646 **B. Monotonic EVPPI estimates**

647 It can be easily demonstrated that the EVPPI is a non-decreasing function of the size of the parameter subset, provided  
 648 the smaller subset is entirely contained within the larger subset. Firstly, some notation must be set up. In line with the  
 649 paper,  $\theta$  represents the set of all underlying model parameters,  $\phi$  is the full set of parameters of interest and  $\psi$  is the  
 650 complement set,  $\theta = (\psi, \phi)$ . In addition to this notation, define  $\xi \subset \phi$  as a smaller subset of parameters of interest and  $\xi^c$   
 651 as the complement of this set such that  $\phi = (\xi, \xi^c)$ .

652 Using this notation we demonstrate that

$$\text{EVPPI}(\phi) \geq \text{EVPPI}(\xi),$$

653 where  $\text{EVPPI}(\phi)$  is the EVPPI of the parameter subset  $\phi$ , as follows:

$$\begin{aligned} \text{EVPPI}(\phi) &= E_{\phi} \left[ \max_t E_{\psi|\phi} [\text{NB}_t(\theta)] \right] - \max_t E_{\theta} [\text{NB}_t(\theta)] \\ &= E_{\xi} \left[ E_{\xi^c|\xi} \left[ \max_t E_{\psi|\phi} [\text{NB}_t(\theta)] \right] \right] - \max_t E_{\theta} [\text{NB}_t(\theta)] \\ &\geq E_{\xi} \left[ \max_t E_{\xi^c|\xi} \left[ E_{\psi|\phi} [\text{NB}_t(\theta)] \right] \right] - \max_t E_{\theta} [\text{NB}_t(\theta)] \\ &= E_{\xi} \left[ \max_t E_{\xi^c|\xi} \left[ E_{\psi|(\xi, \xi^c)} [\text{NB}_t(\theta)] \right] \right] - \max_t E_{\theta} [\text{NB}_t(\theta)] \\ &= E_{\xi} \left[ \max_t E_{(\psi, \xi^c)|\xi} [\text{NB}_t(\theta)] \right] - \max_t E_{\theta} [\text{NB}_t(\theta)] = \text{EVPPI}(\xi) \end{aligned}$$

654 by Jensen's inequality as the function  $\max(\cdot)$  is convex.
